# Supplementary material
Source: PubMed Central journal article supplement (PMC4500934)

18. Weljie AM, Newton J, Mercier P, Carlson E, Slupsky CM. Targeted profiling: Quantitative analysis of 1H NMR metabolomics data. *Anal Chem* 2006; 78(13):4430-4442. [PMID: 16808451]
19. Dieterle F, Ross A, Schlotterbeck G, Senn H. Probabilistic quotient normalization as robust method to account for dilution of complex biological mixtures. application in 1H NMR metabonomics. *Anal Chem* 2006; 78(13):4281-4290. [PMID: 16808434]
20. Luszczek ER, Nelson T, Lexcen D, Witowski NE, Mulier KE, Beilman G. Urine metabolomics in hemorrhagic shock: Normalization of urine in the face of changing intravascular fluid volume and perturbations in metabolism. *J Bioanal Biomed*. 2011; 3:038-048.
21. R Development Core Team. R: A Language and Environment for Statistical Computing. R Foundation for Statistical Computing Vienna Austria. 2010; <http://cran.r-project.org/>.
22. Wishart DS, Knox C, Guo AC, et al. HMDB: A knowledgebase for the human metabolome. *Nucleic Acids Res*. 2009; 37(suppl 1):D603-D610. [PMID: 18953024]
23. Wu B, Conwell DL. The endoscopic pancreatic function test. *Am J Gastroenterol*. 2009; 104(10):2381-2383. [PMID: 19806083]
24. Stevens T, Conwell DL, Zuccaro G, Lewis SA, Love TE. The efficiency of endoscopic pancreatic function testing is optimized using duodenal aspirates at 30 and 45 minutes after intravenous secretin. *Am J Gastroenterol*. 2007; 102(2):297-301. [PMID: 17100964]
25. Boustière C, Sarles H, Lohse J, Durbec J, Sahel J. Citrate and calcium secretion in the pure human pancreatic juice of alcoholic and nonalcoholic men and of chronic pancreatitis patients. *Digestion* 1985; 32(1):1-9. [PMID: 4018438]
26. Sarles H, Bernard J, Johnson C. Pathogenesis and epidemiology of chronic pancreatitis. *Annu Rev Med* 1989; 40(1):453-468. [PMID: 2658760]
27. Simpson D. Citrate excretion: A window on renal metabolism. *American Journal of Physiology-Renal Physiology*. 1983; 244(3):F223-F234. [PMID: 6338740]
28. Hamm LL. Renal handling of citrate. *Kidney Int*. 1990; 38(4):728-735. [PMID: 2332510]
29. Noji T, Nan-ya K, Mizutani M, et al. KF24345, an adenosine uptake inhibitor, ameliorates the severity and mortality of lethal acute pancreatitis via endogenous adenosine in mice. *Eur J Pharmacol* 2002; 454(1):85-93. [PMID: 12409009]
30. Bours M, Swennen E, Di Virgilio F, Cronstein B, Dagnelie P. Adenosine 5'-triphosphate and adenosine as endogenous signaling molecules in immunity and inflammation. *Pharmacol Ther* 2006; 112(2):358-404. [PMID: 1678477]
31. Thompson CI, Sparks HV, Spielman WS. Renal handling and production of plasma and urinary adenosine. *American Journal of Physiology-Renal Physiology*. 1985; 248(4):F545-F551. [PMID: 3985162]
32. Heyne N, Benöhr P, Mühlbauer B, Delabar U, Risler T, Osswald H. Regulation of renal adenosine excretion in humans—role of sodium and fluid homeostasis. *Nephrology Dialysis Transplantation*. 2004; 19(11):2737-2741. [PMID: 15385638]

**Supplementary Table.** Absolute (non-normalized) concentrations of 59 metabolites profiled by NMR in each urine sample for acute pancreatitis patients, chronic pancreatitis patients, and healthy controls. Values are reported as mean±SD with units of µmol/L. Boxplots of each metabolite (non-normalized concentrations) are shown the Supplementary Figure.

| Metabolite              | Acute pancreatitis        | Chronic pancreatitis | Healthy controls | Metabolite             | Acute pancreatitis | Chronic pancreatitis | Healthy controls |
|-------------------------|---------------------------|----------------------|------------------|------------------------|--------------------|----------------------|------------------|
| 1,6-Anhydro β D glucose | 70±86                     | 65±37                | 170±220          | Kynurenine             | 84±141             | 89±37                | 24±4.7           |
| 1-Methylnicotinamide    | 7.1±2.9                   | 230±230              | 20±21            | Lactate                | 32±15              | 69±39                | 66±54            |
| 2-Amino adipate         | 150±120                   | 450±340              | 140±47           | Lactose                | 66±59              | 130±72               | 70±46            |
| 2-Methylglutarate       | 13±9.6                    | 18±7.4               | 24±13            | Malonate               | 68±38              | 290±360              | 89±41            |
| 2-Oxoglutarate          | 34±24                     | 95±70                | 58±49            | Mannose                | 31±32              | 23±17                | 8.9±7.9          |
| 3-Hydroxyisovalerate    | 8.1±4.1                   | 21±10                | 17±9.0           | Methylguanidine        | 11±12              | 47±78                | 18±16            |
| 3-Indoxylsulfate        | 32±30                     | 162±110              | 100±59           | N,N Dimethylglycine    | 8.7±3.3            | 42±45                | 11±5.0           |
| 4-Aminohippurate        | 16±5.3                    | 110±140              | 52±55            | N-Methylhydantoin      | 11±2.8             | 40±27                | 20±8.8           |
| ADP                     | 3.1±1.9                   | 10±8.3               | 5.4±5.7          | N-Phenylacetyl glycine | 100±49             | 330±240              | 140±69           |
| Acetate                 | 16±7.9                    | 45±24                | 29±15            | O-Acetylcholine        | 23±22              | 42±50                | 24±16            |
| Acetoacetate            | 24±24                     | 130±109              | 35±12            | O-Phosphocholine       | 32±24              | 43±37                | 15±6.9           |
| Acetone                 | 84±100                    | 32±22                | 9.5±4.1          | Phenylacetyl glycine   | 83±80              | 400±330              | 98±82            |
| Adenosine               | 7.3±4.5                   | 28±19                | 4.8±3.6          | Pyruvate               | 11±6.4             | 34±25                | 14±3.4           |
| Alanine                 | 35±7.7                    | 86±68                | 68±46            | Quinolate              | 15±11              | 28±24                | 27±25            |
| Allantoin               | 39±26                     | 67±31                | 30±11            | Ribose                 | 230±220            | 440±290              | 82±80            |
| Betaine                 | 30±30                     | 420±650              | 26±18            | Succinate              | 10±11              | 41±21                | 35±26            |
| Caffeine                | 31±18                     | 67±25                | 43±25            | Taurine                | 230±200            | 380±260              | 120±57           |
| Choline                 | 24±22                     | 45±33                | 11±5.9           | Threonine              | 33±14              | 98±100               | 63±30            |
| Citrate                 | 180±110                   | 430±630              | 910±620          | Trigonelline           | 28±26              | 83±84                | 89±60            |
| Creatine                | 51±39                     | 170±88               | 89±69            | Trimethylamine         | 2.5±1.7            | 12±8.7               | 4.6±2.4          |
| Creatinine              | 2,200±1,260               | 6,100±3,800          | 3,500±1,600      | Trimethylamine N-oxide | 110±100            | 520±690              | 140±110          |
| Dimethylamine           | 100±75                    | 220±74               | 120±48           | Tryptophan             | 15±7.1             | 41±34                | 22±19            |
| Ethanolamine            | 76±40                     | 200±140              | 180±130          | Tyramine               | 21±15              | 72±33                | 36±20            |
| Formate                 | 52±31                     | 57±39                | 96±67            | Tyrosine               | 14±6.9             | 40±21                | 27±18            |
| Fumarate                | 2.9±1.7                   | 3.9±2.2              | 2.7±1.3          | Valine                 | 7.3±1.8            | 19±12                | 13±6.8           |
| Glucose                 | 8,200±16,820 <sup>a</sup> | 420±430              | 110±190          | Xanthine               | 49±14              | 97±88                | 38±22            |
| Glycine                 | 130±63                    | 370±500              | 300±191          | cis-Aconitate          | 80±58              | 200±120              | 130±59           |
| Hippurate               | 340±290                   | 530±480              | 410±270          | pi.Methylhistidine     | 84±36              | 440±590              | 100±60           |
| Hypoxanthine            | 9.2±6.8                   | 97±181               | 14±5.2           | tau.Methylhistidine    | 56±43              | 120±91               | 48±18            |
| Inosine                 | 10±7.5                    | 25±33                | 5.2±4.9          |                        |                    |                      |                  |

<sup>a</sup> One acute pancreatitis patient had a raw glucose of 38 mM. Without this value, mean glucose values for acute pancreatitis patients are 650±110 µmol/L.

**Supplementary Figure.** Boxplots of absolute (non-normalized) concentrations of 59 profiled urinary metabolites. The box covers the first (Q1) and third (Q3) quartile of the data. The line in the box represents the median value. The whiskers extend to  $\pm 1.5$  interquartile range (IQR), where  $IQR=Q3-Q1$ . Outliers are shown as points. Concentration units are expressed in  $\mu\text{mol/L}$ .

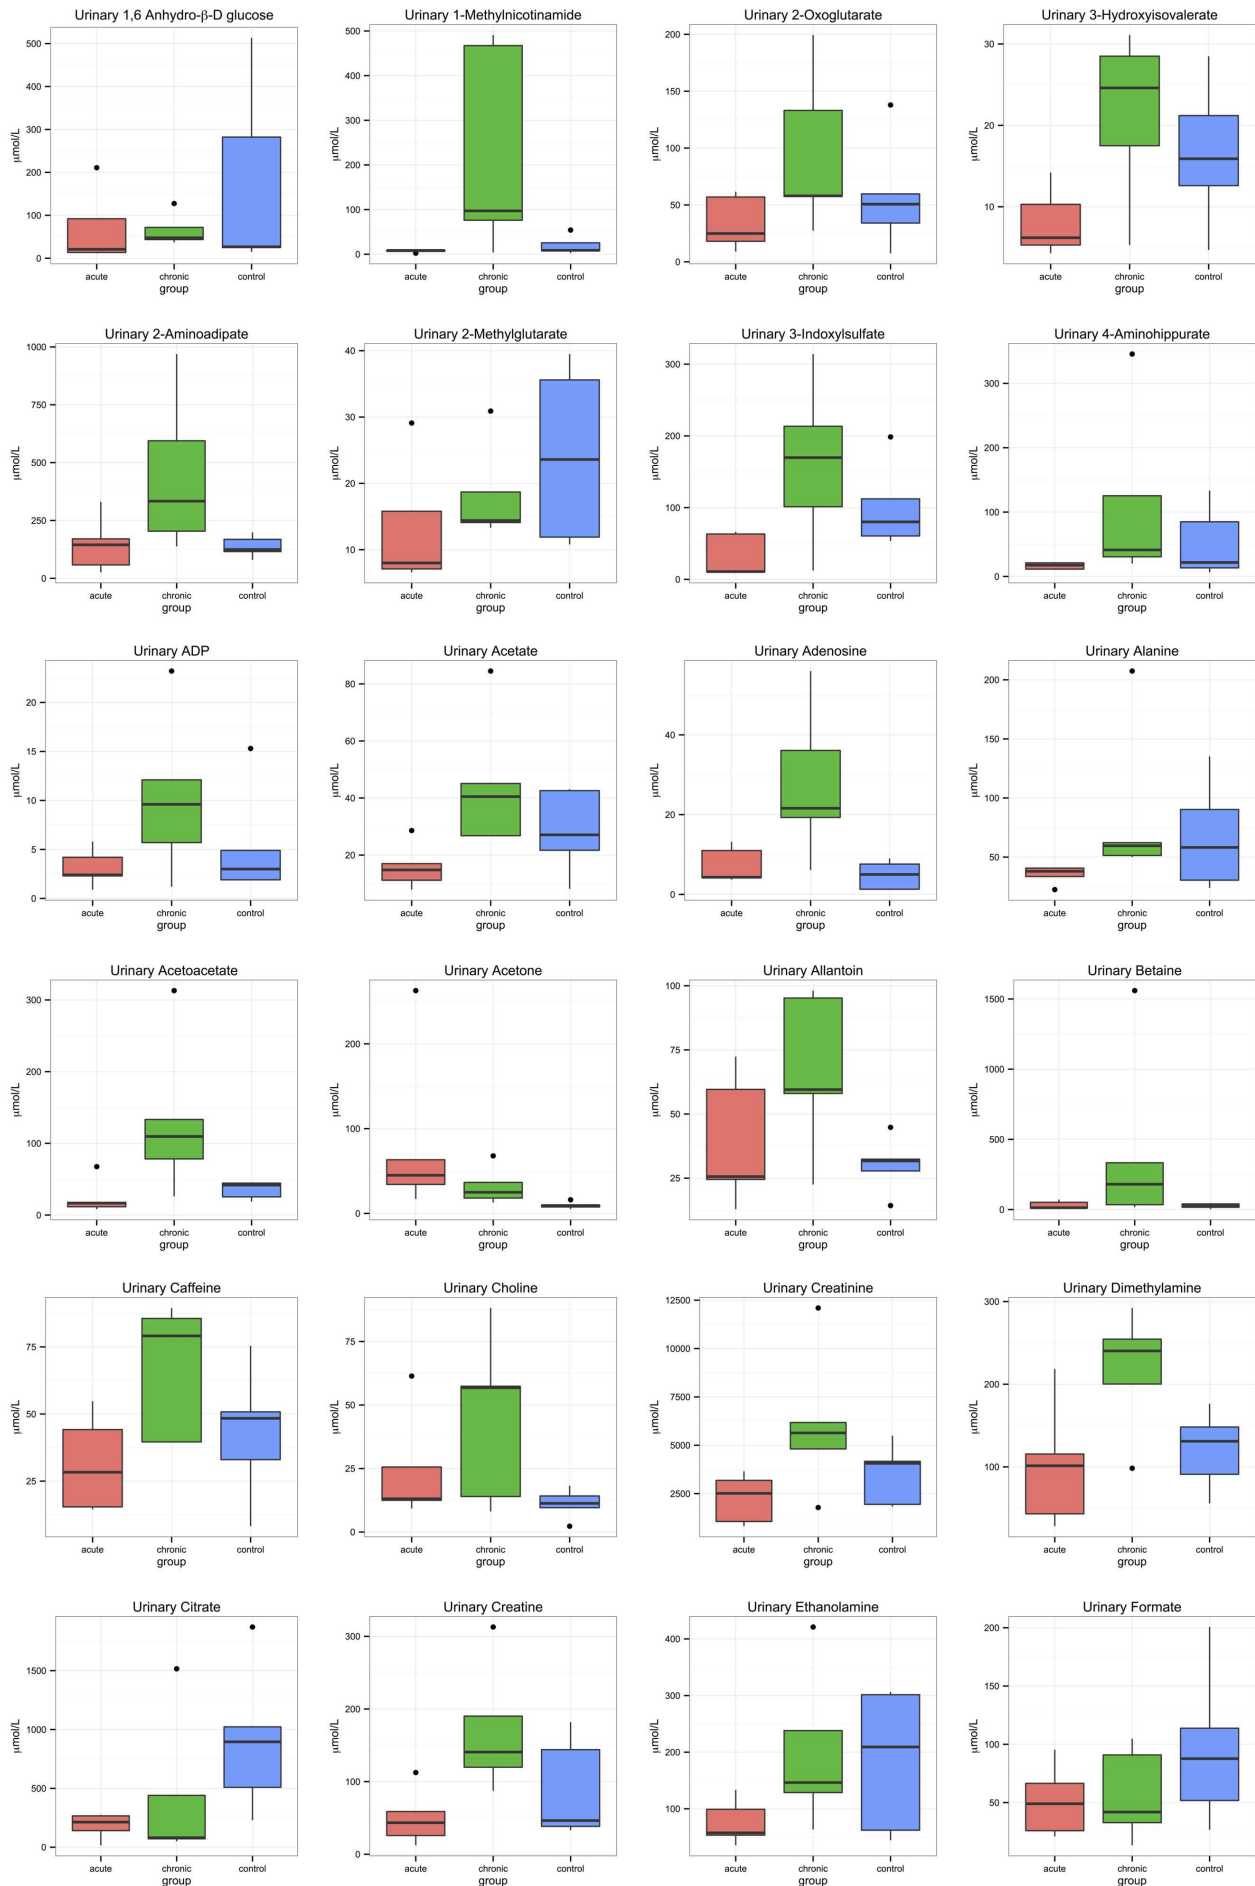

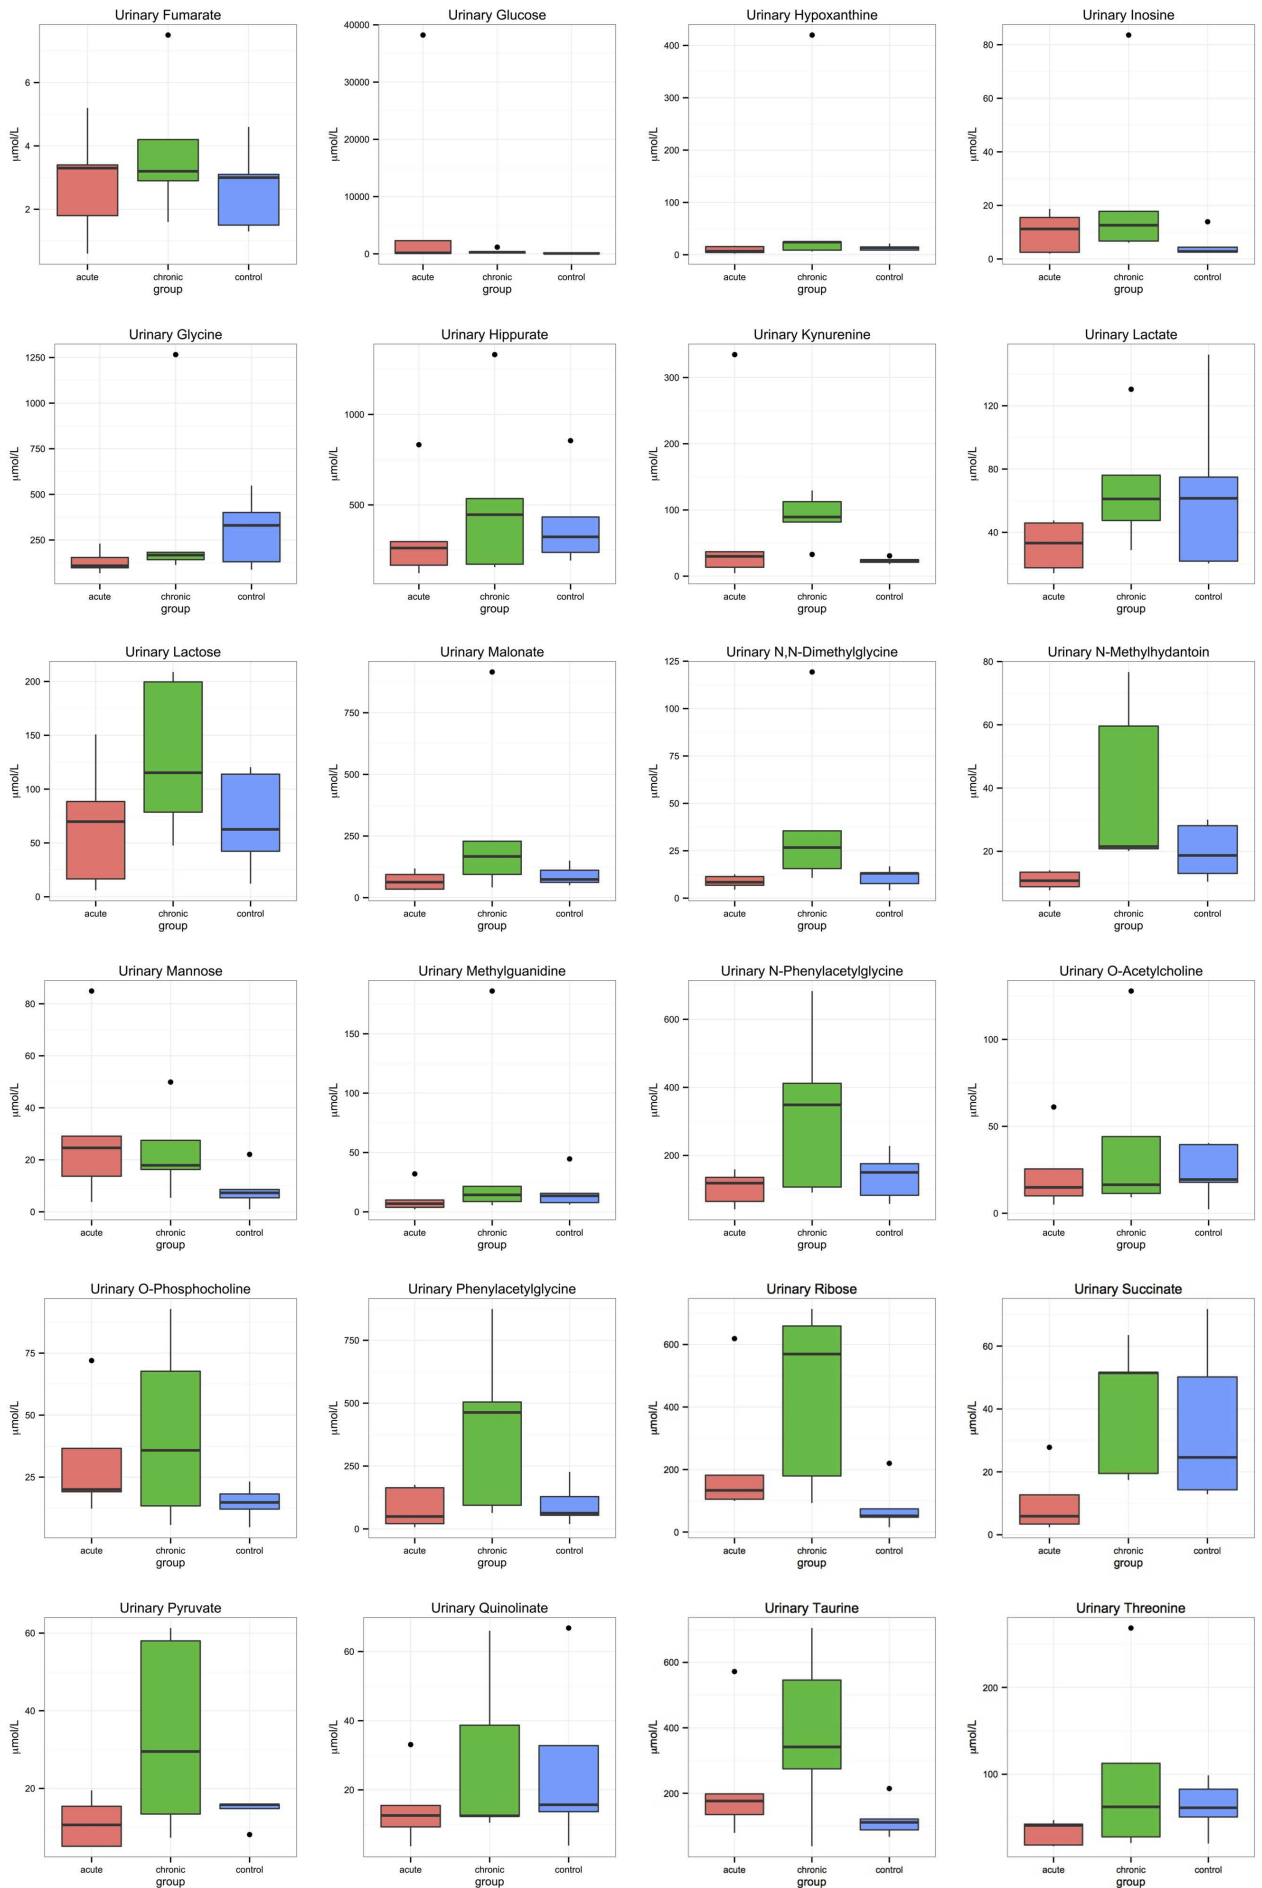

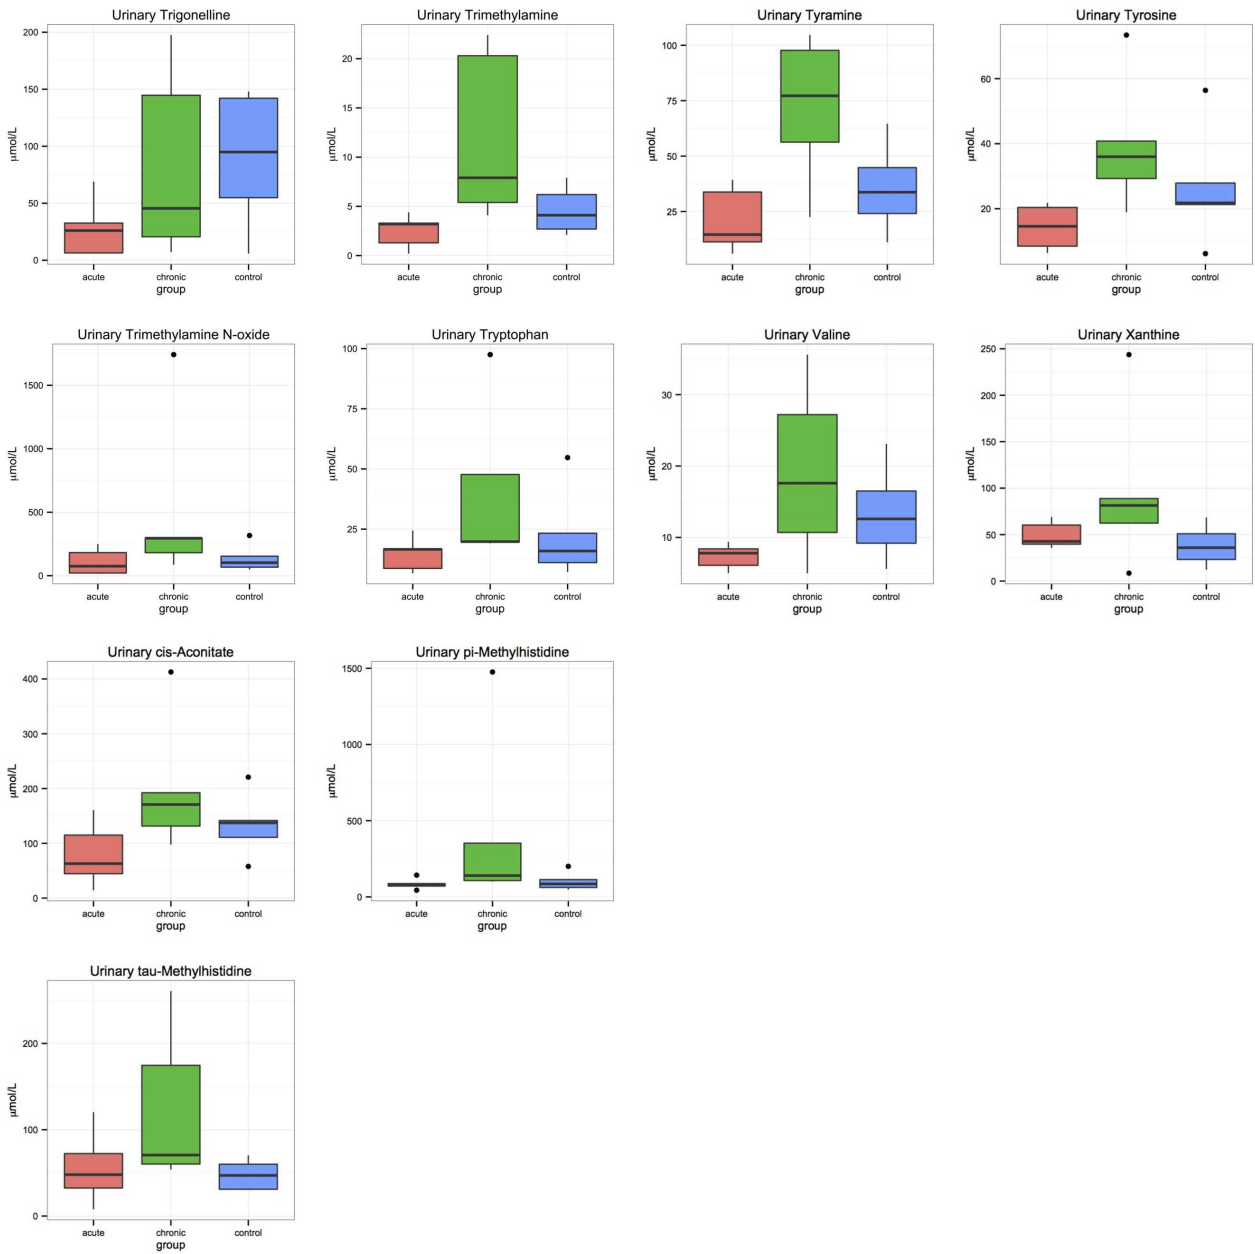

Supplement: NIHMS705560-supplement-supplement_1.pdf [file NIHMS705560-supplement-supplement_1.pdf]
